# Supplementary material for: Discrimination and identification of different amines by pattern recognition of kinetic spectral data
Source: Royal Society of Chemistry journal article supplement (doi:10.1039/c2ay25078k), 2012-01-01
Supplement: c2ay25078k.pdf [file c2ay25078k.pdf]

## Supporting Information

# Discrimination and identification of different amines by pattern recognition of kinetic spectral data

Masoumeh Hasani\*<sup>†</sup>, Fereshteh Emami<sup>†</sup>

<sup>†</sup>Faculty of Chemistry, Bu-Ali Sina University, Hamedan 65174, Iran

E-mail: [hasani@basu.ac.ir](mailto:hasani@basu.ac.ir)

**Table S1.** Aliphatic amine samples evaluated

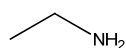

Ethylamine

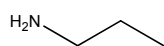

n-Propylamine

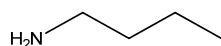

n-Butylamine

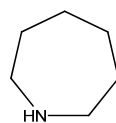

Hexamethylenimine

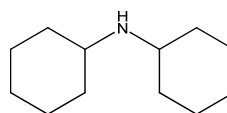

Dicyclohexylamine

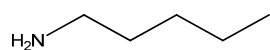

n-Pentylamine

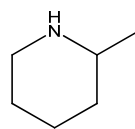

2-Methyl-piperidine

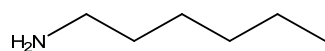

n-Hexylamine

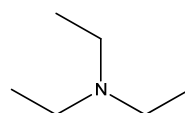

Triethylamine

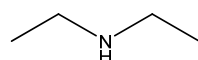

Diethylamine

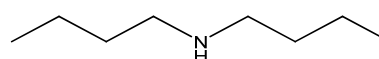

Dibutylamine

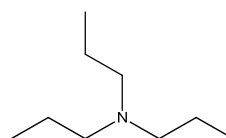

Tripropylamine

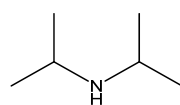

Diisopropylamine

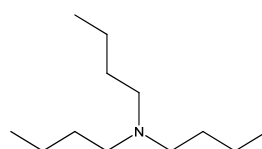

Tributylamine

---

**Table S2.** Aromatic amine samples evaluated

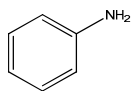

Aniline

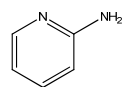

Pyridine-2-amine

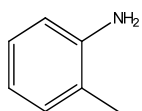

o-Toluidine

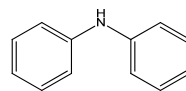

Diphenylamine

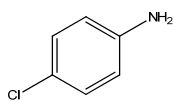

4-Chloroaniline

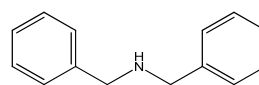

Dibenzylamine

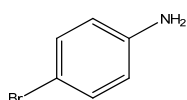

4-Bromoaniline

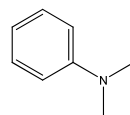

N,N-Dimethylaniline

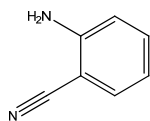

2-aminobenzonitrile

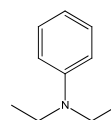

N,N-Diethylaniline

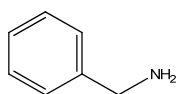

Benzylamine

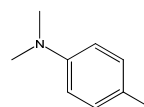

N,N-Dimethyl-p-toluidine

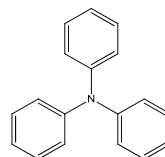

Triphenylamine

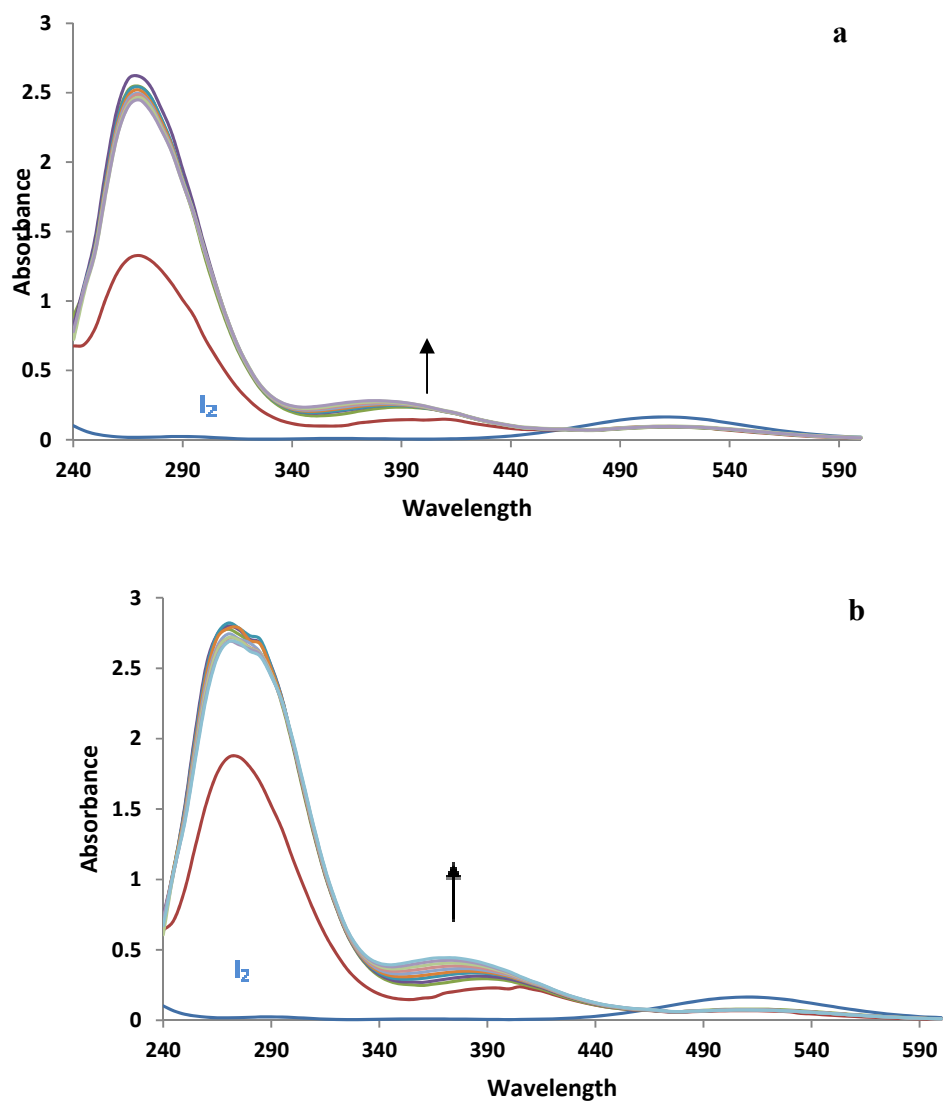

**Figure S1.** The electronic absorption spectra of iodine ( $2.0 \times 10^{-4}$  M) and (a) Dibutylamine ( $2.0 \times 10^{-4}$  M), (b) Hexamethyleneimine ( $2.0 \times 10^{-4}$  M) in chloroform solution in during 10 min.

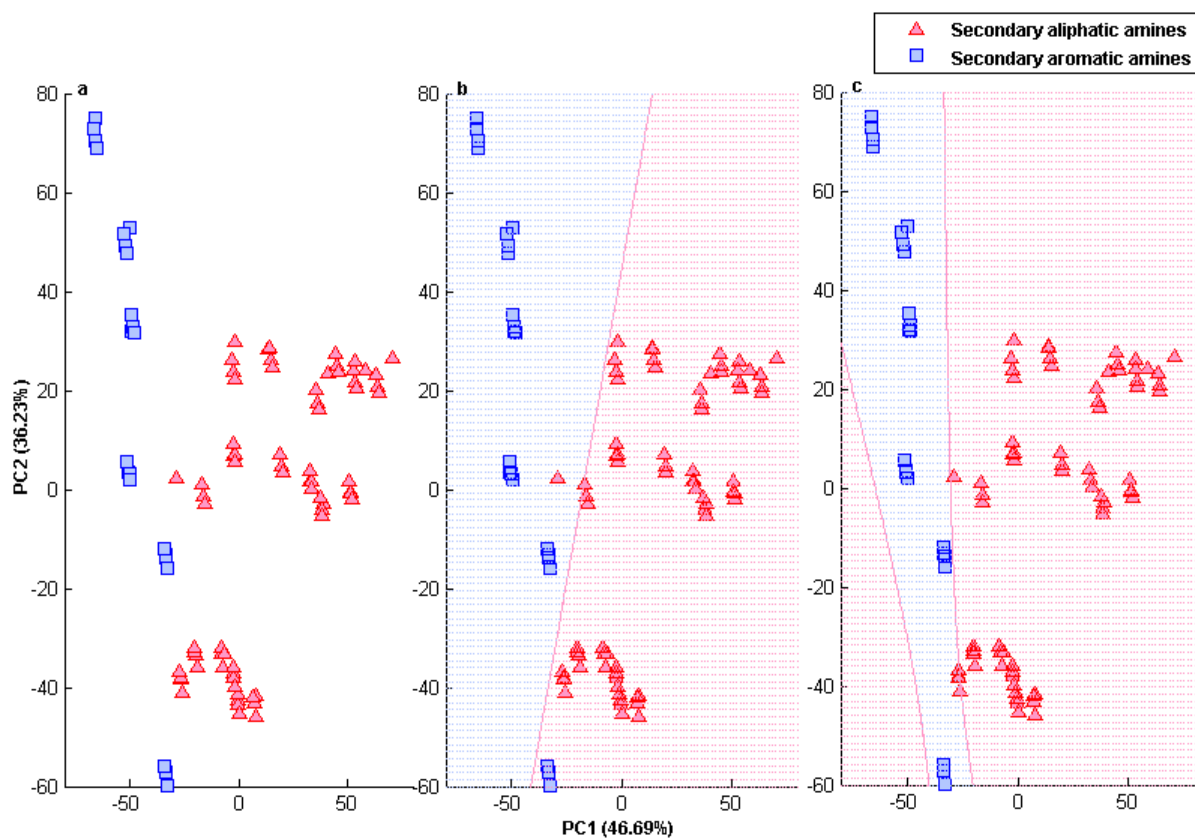

**Figure S2.** a) Score plot, visualisation of boundaries obtained by b) LDA and c) QDA for secondary amine complexes using default data preprocessing, and data represented by the scores of the first two PCs. Percentage on the PC axes define weight of those axes to the overall pattern. Four trials each, at three different concentrations [ $2.0$ ,  $4.0$  and  $6.0 \times 10^{-4}$  M] for various of amines. The respective regions belonging to each class are coloured appropriately. Studies are carried out in 1:1 ratio of amine/iodine complex.

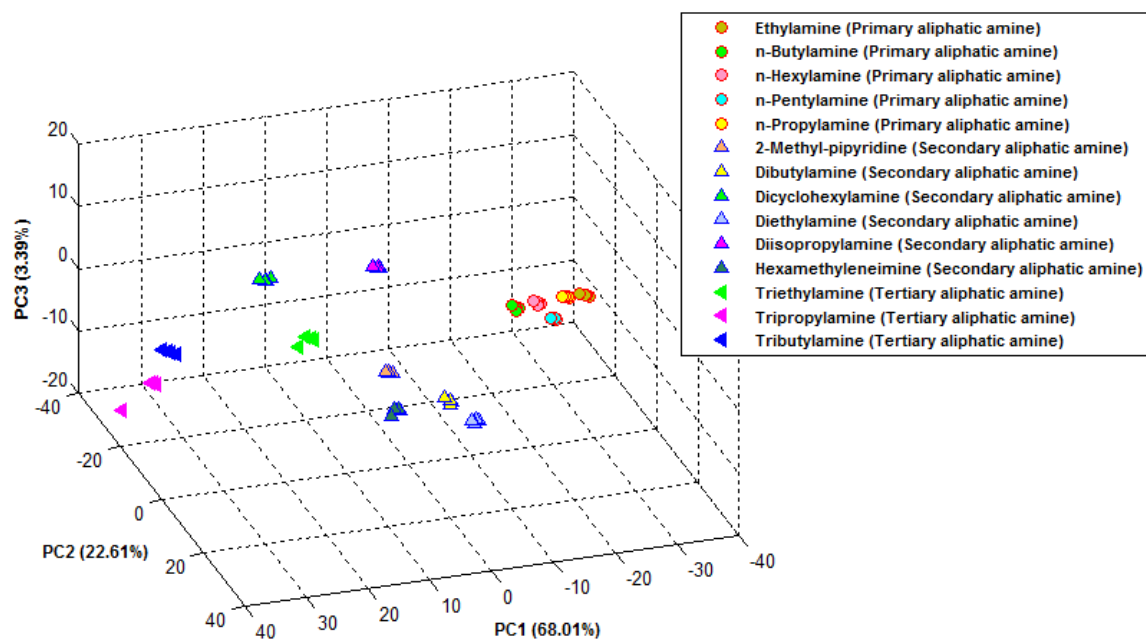

**Figure S3.** Three dimensional PCA plot for each aliphatic amine complex trial. Percentage on the PC axes define weight of those axes to the overall pattern. PCA score plot shows clustering for all fourteen samples (four trials each,  $2 \times 10^{-4}$  M of amines and iodine). The additional dimension further separates the amines.

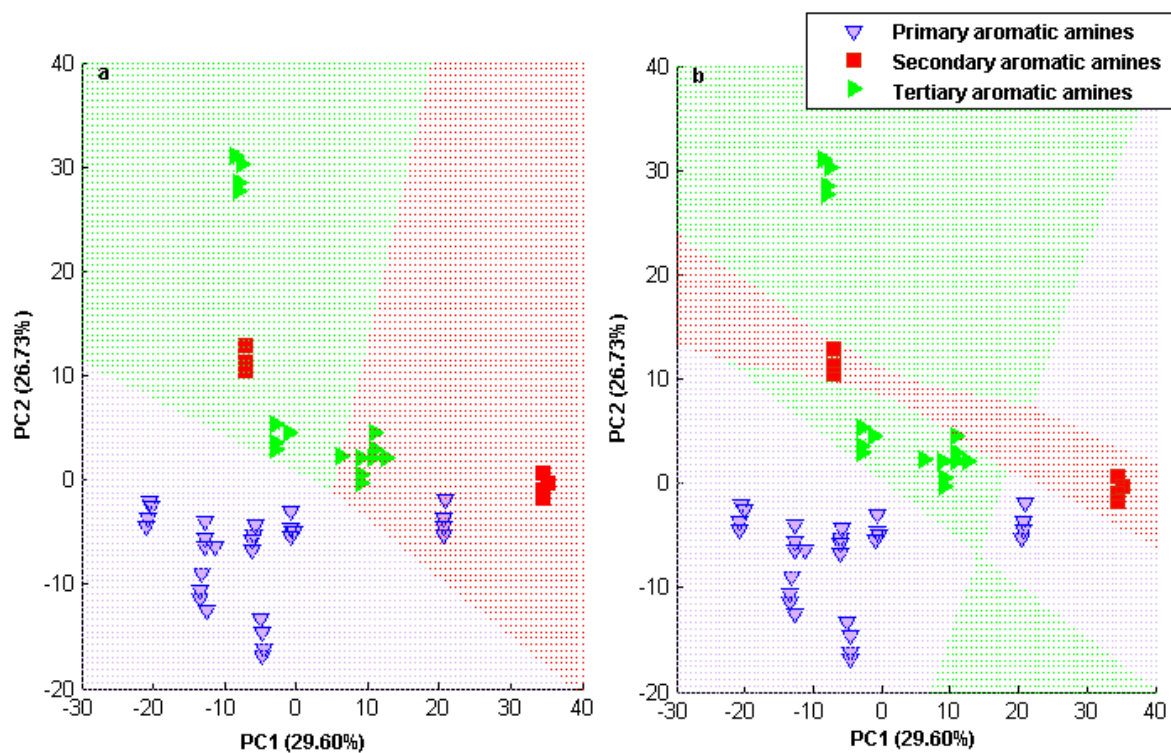

**Figure S4.** Visualisation of boundaries obtained by a) LDA and b) QDA for aromatic amine complexes using default data preprocessing, and data represented by the scores of PC1 and PC2. Percentage on the PC axes define weight of those axes to the overall pattern. Four trials each, at  $4 \times 10^{-4}$  M for various of amines. The respective regions belonging to each class are coloured appropriately. All studies carried out in 1:1 ratio of amine/iodine complex.

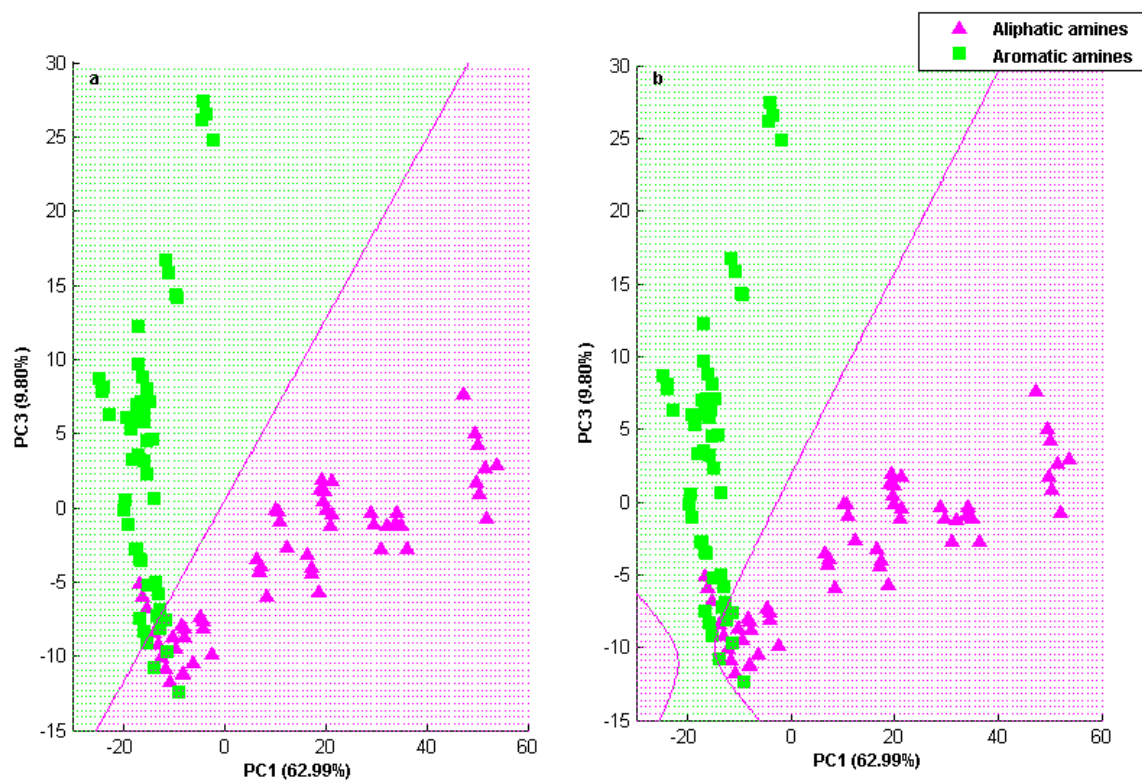

**Figure S5.** Visualisation of boundaries obtained by a) LDA and b) QDA for total amine complexes. Using default data preprocessing, and data represented by the scores of PC1 and PC3. Percentage on the PC axes define weight of those axes to the overall pattern. Four trials each, at  $2 \times 10^{-4}$  M for various of amines. The respective regions belonging to each class are coloured appropriately. All studies carried out in 1:1 ratio of amine/iodine complex.



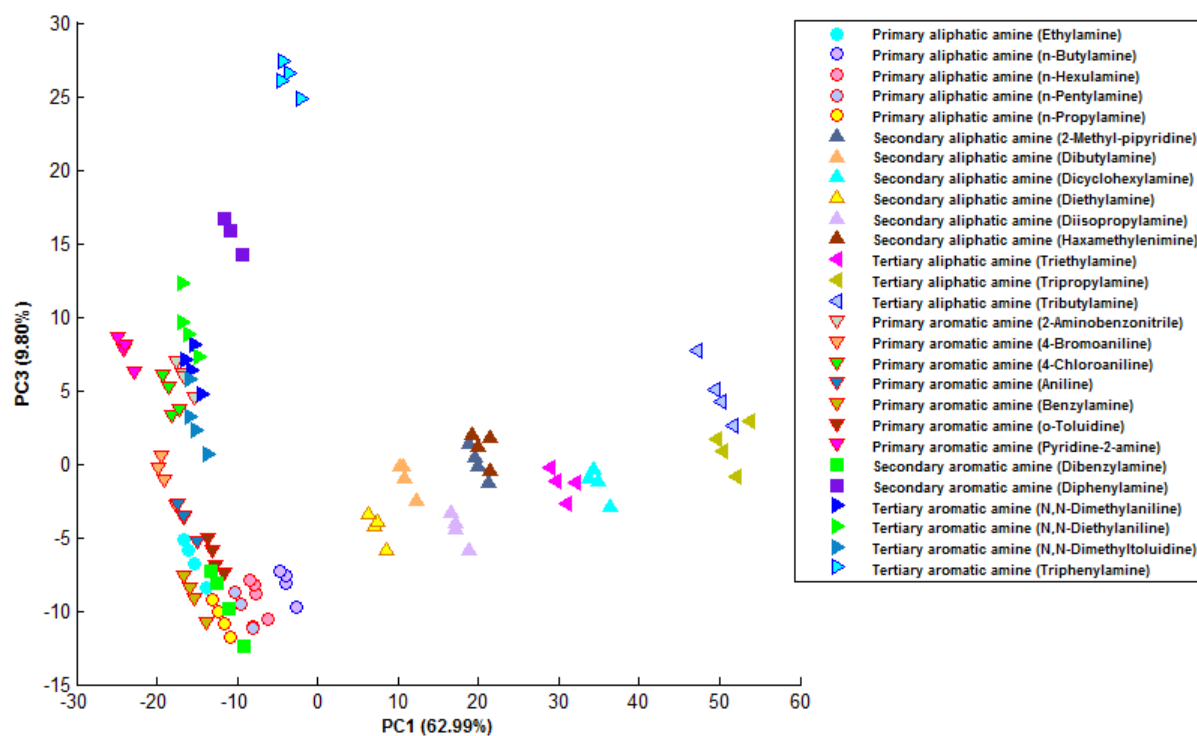

**Figure S6.** Two dimensional PCA plot for each total amine complex trial. Percentage on the PC axes define weight of those axes to the overall pattern. PCA score plot shows clustering for all 27 samples (four trials each,  $2 \times 10^{-4}$  M of amines and iodine).
